# Supplementary material for: Characteristics of human - sloth bear (Melursus ursinus) encounters and the resulting human casualties in the Kanha-Pench corridor, Madhya Pradesh, India
Source: PLoS One. 2017 Apr 27;12(4):e0176612. doi: 10.1371/journal.pone.0176612 (PMC5407616; doi:10.1371/journal.pone.0176612)
Supplement: S2 File — (XLSX) [file pone.0176612.s002.xlsx]

## Sheet: Table 1. Village coordinates
Village Name	Latitude	Longitude
Agari	21 43 58.7	079 35 11.2
Amrutola	21 58 05.9	080 24 38.9
Antara	21 55 30.4	079 49 59.0
Arjunjir	22 17 27.5	079 56 10.4
Atariya	21 35 33.3	080 31 12.2
Badgao	21 50 08.4	080 01 11.3
Badgao (Jivantola)	21 50 42.3	080 01 24.5
Bagoli	22 08 37.2	080 22 10.9
Bamhani	21 51 38.9	080 27 22.1
Batua	22 14 30.3	080 08 24.5
Bhadgaon	22 05 34.3	080 45 52.6
Bhimdogri	22 17 13.7	080 58 53.6
Bhorgondi	22 17 57.6	080 00 11.6
Bhuitola (Katangi)	22 15 50.3	080 56 28.6
Bichtola	21 57 52.4	080 35 40.3
Bijhora	21 58 43.7	080 22 50.3
Borgao	21 47 46.5	079 31 07.5
chanai	22 17 10.9	080 21 33.8
Chhapri	22 20 15.1	080 29 06
Chikhalabaddi	21 56 36.3	079 55 18.5
Chikhlapani	21 48 26.5	079 36 39.1
Chirchira	21 50 05.9	079 51 50.3
Chutka	22 12 34.5	079 45 45.1
Darbaritola	22 09 38.2	080 02 04.2
Devgaon	22 05 37.6	080 52 05.5
Devtola	21 38 88.1	080 27 01.9
Dhamangao	22 25 14.3	080 32 01.6
Dhapevada	21 53 42.6	080 11 28.2
Dharamshala	21 44 22.7	080 43 03.1
Dharavashi	22 00 49.3	079 59 11.7
Dhobotola Mal	21 42 30.6	079 39 20.7
Didkatola	22 08 27.0	080 28 14.3
Dongarbodi	21 58 11.2	080 09 09.6
Dorli	22 07 59.2	080 18 35.7
Dudhiya	22 16 32.6	079 54 25.1
Ghuitola (Indri)	22 17 07.7	080 57 18.9
Ghuitola (Kergi)	22 15 50.2	080 56 28.7
Ghunadi	21 48 52.1	079 50 54.7
Gokalpur	22 45 09.2	079 40 48.0
Harratola	21 52 29.9	080 31 58.9
Hirri	21 54 49.8	080 29 26.6
Hirritola	22 11 17.4	079 53 14.7
Indori	21 59 53.6	079 49 14.4
Jagla	21 54 10.5	080 36 48.3
Jalda	21 51 04.5	080 35 12.5
Kachhar	21 51 54.6	079 48 51.5
Kachurna	21 59 38.5	080 09 29
Kairetola	22 47 14.3	079 40 09.2
Kakodi	21 35 22.8	080 27 09.1
Kalimati	22 16 48.2	079 55 08.8
Kalyanpur	21 57 43.9	079 48 33.3
Kanai	22 14 08.3	080 18 45.5
Kanjai	22 00 19.8	079 58 29
Karajmara	21 47 59.23	079 35 43.8
karvahi	21 58 48.0	080 33 37.3
Katanjari	21 50 47.1	079 58 36.8
keslai	22 03 16.2	080 22 33.4
Khalaundi	22 18 40.2	080 55 50.4
Khalondi	22 14 24.1	080 21 59.2
Khapa	22 11 30.0	080 34 00.8
Khara	21 58 13.3	080 15 51.2
Kharghat	21 44 46.1	079 30 44.2
Khatiya	22 18 31.4	080 30 54.7
Khursodi	21 53 05.5	080 01 05.3
kisanpur	22 45 18.4	079 42 18.2
Kisli	22 18 44.1	080 45 32.6
kochevahi	21 47 08.8	079 55 38.6
Kopizola	22 10 37.3	079 54 02.5
Kumbhari	22 06 22.2	080 07 12.9
Kumbhitola	22 16 50.7	080 43 10.5
Kumbhitola (Manoharpur)	22 16 39.9	080 43 08.7
Majgaon	21 46 59.4	80 49 22.2
Manutola	22 00 39.3	079 59 11.7
Mendra	21 36 45.5	080 31 00.3
Mohbarra	22 16 19.4	080 03 02.2
Mordongari	22 13 40.8	079 48 47.0
Moriya	22 06 26.3	080 08 04.2
Murkutta	21 50 28.8	080 40 59.6
Naitola	22 08 43.40	079 59 27.50
Navegao	21 55 04.5	079 57 08.8
Netra	21 51 13.1	080 00 13.1
Nevargao	22 18 48.4	080 02 00.8
Niwas	22 14 05.2	080 48 46.0
Pachpedi	22 14 05.2	080 48 46
Palhera	21 35 10.8	080 26 00.7
Pandrapani	22 12 30.8	079 55 35.7
Paraspani	21 41 39.8	079 35 19.0
Parsatola	22 00 31.2	080 32 36.7
Patan	21 46 05.0	079 33 20.9
Patharfodi	22 15 11.6	079 52 42.9
Phandki	22 05 25.0	080 18 25.8
Pindraibutte	21 47 59.7	079 33 50.4
Pipariya	21 50 22.9	080 00 03.9
Ramrama	21 50 47.2	079 55 55.7
Rumal	22 18 43.6	080 03 43.4
Sakritola	21 35 30.1	080 28 41.1
Salfa	21 59 59.9	080 20 39.0
Samariya	22 13 20.5	080 51 14.8
Samnapur	21 56 52.8	080 09 31.9
Sanaikachhar	22 46 23.0	079 38 34.1
Saraipatera	22 06 17.3	080 51 27.6
Sitkutola (Nevergaon)	21 55 36.5	080 09 45.5
Sonevani	21 52 34.0	080 20 57.6
Sonpuri	21 55 40.6	080 11 26.3
Taktauva	22 25 32.6	080 34 00.4
Tekadi	21 49 07.9	079 52 49.9
Tekadi	22 12 14.3	079 47 16.8
Tekadi (Pandartola)	21 49 07.9	079 59 49.8
Temni	21 33 17.6	080 27 53.1
Tendudi	21 47 13.5	080 44 07.8
Tendutola	22 20 41.0	080 00 18.6
Tikariya	22 03 16.3	080 14 02.1
Tikariya	22 06 08.2	080 27 36.9
Topla	22 13 36.72	080 52 55.60
Udadna	22 13 45.0	080 15 25.4
Ugali	22 15 43.9	080 04 09.8
Umardauni	21 56 38.8	080 13 55.8
Varudgota	22 5 28.00	080 18 26.49
Jarera	21 53 25.1	080 12 16.5
Zitarra	22 18 13.5	080 02 43.3

## Sheet: Table 2. Gender-wise age
Men	Women
12	9
12	14
16	14
16	16
17	16
19	29
20	32
20	32
22	35
25	35
26	35
27	36
27	38
27	38
27	40
28	40
28	42
29	42
30	45
30	45
30	45
30	45
30	48
32	50
32	52
33	55
34	55
35	56
35	56
35	56
35	60
35	60
35	61
35	65
36	65
36	70
38	33
38	50
38	45
38	30
38	32
38	36
39	42	MEDIAN
40
40
40
40
40
40
40
40
41
42
43
43
43
44
45
45
45
45
45
45
45
45
45
45
46
46
48
48
48
50
50
50
50
50
50
51
51
52
52
52
53
53
55
55
55
56
57
60
60
60
60
60
62
68
70
45
30
35
60
32
36
23
40
40
48
55
65
50
50
52
40
45
42
45
45
60
30
30
42
35
50
40.5

## Sheet: Table 3. Social groups
Social groups	% cases
Gond	53.6145
Baiga	17.4699
Pawar	6.62651
Marar	4.21687
Others	18
